# Supplementary material for: Identification of Functional Domains in the Cohesin Loader Subunit Scc4 by a Random Insertion/Dominant Negative Screen
Source: PubMed Central journal article supplement (PMC4978918; doi:10.1534/g3.116.031674), 2016-06-07
Supplement: supp_g3.116.031674_TableS1.pdf [file supp_g3.116.031674_TableS1.pdf]

**Supplementary Table S1. Yeast Strains**

| <b>Strain</b> | <b>Genotype</b>                                                                                                                    |
|---------------|------------------------------------------------------------------------------------------------------------------------------------|
| YIO002        | <i>MATa scc4Δ::HIS3 scc4-4::LEU2 SCC3-18MYC::TRP1 SMC1-6HA::HIS3 pep4Δ::LEU2 ade2</i>                                              |
| YMS1004       | <i>MATa scc4Δ::HIS3 scc4-4::LEU2 SCC3-18MYC::TRP1 SMC1-6HA::HIS3 pep4Δ::LEU2 ade2 ura3::SCC4-3V5:URA3</i>                          |
| YMS1005       | <i>MATa scc4Δ::HIS3 scc4-4::LEU2 SCC3-18MYC::TRP1 SMC1-6HA::HIS3 pep4Δ::LEU2 ade2 ura3::scc4-L490ins-3V5:URA3</i>                  |
| YMS1006       | <i>MATa scc4Δ::HIS3 scc4-4::LEU2 SCC3-18MYC::TRP1 SMC1-6HA::HIS3 pep4Δ::LEU2 ade2 ura3::scc4-L305ins-3V5:URA3</i>                  |
| YMS1007       | <i>MATa scc4Δ::HIS3 scc4-4::LEU2 SCC3-18MYC::TRP1 SMC1-6HA::HIS3 pep4Δ::LEU2 ade2 ura3::scc4-V485ins-3V5:URA3</i>                  |
| YMS1008       | <i>MATa scc4Δ::HIS3 scc4-4::LEU2 SCC3-18MYC::TRP1 SMC1-6HA::HIS3 pep4Δ::LEU2 ade2 ura3::scc4-S505ins-3V5:URA3</i>                  |
| YMS1010       | <i>MATa trp1-1 leu2-3,112 ura3-52 his3-11,15 GAL+scc4-4 cloNAT lys4::LacO GFP-LacI-HIS3</i>                                        |
| YMS1011       | <i>MATa trp1-1 leu2-3,112 ura3-52 his3-11,15 GAL+ scc4-4 cloNAT lys4::LacO GFP-LacI-HIS3 SCC4-3V5 URA3</i>                         |
| YMS1012       | <i>MATa trp1-1 leu2-3,112 ura3-52 his3-11,15 GAL+ scc4-4 cloNAT lys4::LacO GFP-LacI-HIS3 ura3::scc4-L490ins-3V5:URA3</i>           |
| YMS1013       | <i>MATa trp1-1 leu2-3,112 ura3-52 his3-11,15 GAL+scc4-4 cloNAT lys4::LacO GFP-LacI-HIS3 ura3::scc4-L305ins-3V5:URA3</i>            |
| YMS1014       | <i>MATa trp1-1 leu2-3,112 ura3-52 his3-11,15 GAL+ scc4ts cloNAT lys4::LacO GFP-LacI-HIS3 ura3::scc4-V485ins-3V5:URA3</i>           |
| YMS1015       | <i>MATa trp1-1 leu2-3,112 ura3-52 his3-11,15 GAL+ scc4ts cloNAT lys4::LacO GFP-LacI-HIS3 ura3::scc4-S505ins-3V5:URA3</i>           |
| YMS1003       | <i>MATa pep4Δ::g418::TRP1 trp1-1 leu2-3,112 ura3-52 his3-11,15 bar1 GAL+ his3::SCC2-12MYC:HIS3 MX</i>                              |
| YMS1016       | <i>MATa pep4Δ::g418::TRP1 trp1-1 leu2-3,112 ura3-52 his3-11,15 bar1 GAL+ his3::SCC2-12MYC:HIS3 MX, ura3::SCC4-3V5:URA3</i>         |
| YMS1017       | <i>MATa pep4Δ::g418::TRP1 trp1-1 leu2-3,112 ura3-52 his3-11,15 bar1 GAL+ his3::SCC2-12MYC:HIS3 MX, ura3::scc4-L305ins-3V5:URA3</i> |

| <b>Strain</b> | <b>Genotype</b>                                                                                                                                                     |
|---------------|---------------------------------------------------------------------------------------------------------------------------------------------------------------------|
| YMS1018       | <i>MATa pep4Δ::g418::TRP1 trp1-1 leu2-3,112 ura3-52 his3-11,15 bar1 GAL+ his3::SCC2-12MYC:HIS3 MX, ura3::scc4-V485ins-3V5:URA3</i>                                  |
| YMS1019       | <i>MATa pep4Δ::g418::TRP1 trp1-1 leu2-3,112 ura3-52 his3-11,15 bar1 GAL+ his3::SCC2-12MYC:HIS3 MX, ura3::scc4-L490ins-3V5:URA3</i>                                  |
| YMS1020       | <i>MATa pep4Δ::g418::TRP1 trp1-1 leu2-3,112 ura3-52 his3-11,15 bar1 GAL+ his3::SCC2-12MYC:HIS3 MX, ura3::scc4-S505ins-3V5:URA3</i>                                  |
| YMS1021       | <i>MATa SCC2-3V5-AID2-G418 TIR1-CaTRP1 LacO(DK)-NAT::lys4 leu2-3,112 GAL+ pHIS3-GFPLacI-HIS3:his3-11,15 bar1 ura3-52 ura3::SCC4-3V5:URA3</i>                        |
| YMS1022       | <i>MATa SCC2-3V5-AID2-G418 TIR1-CaTRP1 LacO(DK)-NAT::lys4 leu2-3,112 GAL+ pHIS3-GFPLacI-HIS3:his3-11,15 bar1 ura3-52 ura3::SCC4-3V5:URA3, leu2::SMC1-3Flag:LEU2</i> |
| YMS1023       | <i>MATa scc4Δ::HIS3 scc4-4::LEU2 SCC3-18MYC::TRP1 SMC1-6HA::HIS3 pep4Δ::LEU2 ade2 ura3::scc4-L306E-3V5:URA3</i>                                                     |
| YMS1024       | <i>MATa scc4Δ::HIS3 scc4-4::LEU2 SCC3-18MYC::TRP1 SMC1-6HA::HIS3 pep4Δ::LEU2 ade2 ura3::scc4-L307E-3V5:URA3</i>                                                     |
| YMS1025       | <i>MATa scc4Δ::HIS3 scc4-4::LEU2 SCC3-18MYC::TRP1 SMC1-6HA::HIS3 pep4Δ::LEU2 ade2 ura3::scc4-W490A-3V5:URA3</i>                                                     |
| YMS1026       | <i>MATa scc4Δ::HIS3 scc4-4::LEU2 SCC3-18MYC::TRP1 SMC1-6HA::HIS3 pep4Δ::LEU2 ade2 ura3::scc4-L491E-3V5:URA3</i>                                                     |
