# Supplementary material for: Identification of Functional Domains in the Cohesin Loader Subunit Scc4 by a Random Insertion/Dominant Negative Screen
Source: PubMed Central journal article supplement (PMC4978918; doi:10.1534/g3.116.031674), 2016-06-07
Supplement: supp_g3.116.031674_TableS2.pdf [file supp_g3.116.031674_TableS2.pdf]

**Supplementary Table S2. Plasmids**

| <b>Plasmid</b> | <b>Description</b>                 |
|----------------|------------------------------------|
| pIO014         | pGAL- <i>SCC4 CEN URA3</i>         |
| pMS011         | pGAL- <i>SCC4-L305ins CEN URA3</i> |
| pMS012         | pGAL- <i>SCC4-V485ins CEN URA3</i> |
| pMS013         | pGAL- <i>SCC4-L490ins CEN URA3</i> |
| pMS014         | pGAL- <i>SCC4-S505ins CEN URA3</i> |
| pMS015         | pGAL- <i>SCC4-E374* CEN URA3</i>   |
| pMS016         | pGAL- <i>SCC4-L465* CEN URA3</i>   |
| pMS017         | pGAL- <i>SCC4-Y551* CEN URA3</i>   |
| pMS018         | pGAL- <i>Scs4(1-187) CEN URA3</i>  |
| pMS019         | pGAL- <i>Scs4(1-94) CEN URA3</i>   |
| pMS2           | <i>SCC4-3V5 URA3</i>               |
| pMS024         | <i>scc4-L305ins-3V5 URA3</i>       |
| pMS025         | <i>scc4-V485ins-3V5 URA3</i>       |
| pMS026         | <i>scc4-L490ins-3V5 URA3</i>       |
| pMS027         | <i>scc4-S505ins-3V5 URA3</i>       |

|        |                                             |
|--------|---------------------------------------------|
| pMS028 | <i>scc4-L306E-3V5 URA3</i>                  |
| pMS029 | <i>scc4-L307E-3V5 URA3</i>                  |
| pMS030 | <i>scc4-W490A-3V5 URA3</i>                  |
| pMS031 | <i>scc4-L491E-3V5 URA3</i>                  |
| pMS041 | pET28a- <i>Scs4(1-187)</i> Kan <sup>r</sup> |
