# Supplementary material for: Identification of Functional Domains in the Cohesin Loader Subunit Scc4 by a Random Insertion/Dominant Negative Screen
Source: PubMed Central journal article supplement (PMC4978918; doi:10.1534/g3.116.031674), 2016-06-07
Supplement: supp_g3.116.031674_TableS3.pdf [file supp_g3.116.031674_TableS3.pdf]

**Supplementary Table S3. Primers**

| Location                 |        | Forward                  | Reverse                  |
|--------------------------|--------|--------------------------|--------------------------|
| Chr. III<br>(CARC1)      | 99327  | AGCGGATCAATCCACAAAGC     | TGCTGTAGTCACCTCAGCAAG    |
|                          | 99690  | AAAGGTGCCCAAGAAAAGG      | AGCACTTTACTCGCTTGTGG     |
|                          | 100235 | ATGCCAAGGCGGAAAGAATG     | TGGGGGCTTCTCGATTTTTG     |
|                          | 100925 | ATGAGAAAGAGGGGTTCTTCG    | GGCGTCAATGCTTTAGTTCTCC   |
|                          | 101809 | ACTTTGGTTTTCCGGTGTGC     | CCAGCGATGAGATGCGAAAAG    |
|                          | 102140 | ATGGTTCGGTTGGTGCTTAG     | ACGCGGAATTGAAACCACAG     |
|                          | 101956 | TCGCTTTTCGCATCTCATCG     | AGCGGGCGGGTTATAAATAAC    |
| Chr. III<br>(MAT CAR)    | 288405 | TCGTCTCCTAGAACTCCACTTAC  | GGCCAATTCTGGCAAACCTTATT  |
|                          | 289283 | CCAGTGCTGTAAGTGTCTCTC    | GCCTTGACATATCCGGGTAATA   |
|                          | 289846 | TGTAGGTGCAGAAAGAGAAAGT   | CCAAGGCATAATGTGTGAAGTG   |
|                          | 290608 | GTTGTATTTCTTCCGTCTCACATT | CAAGACTCACCTTCCAGTACATAG |
|                          | 291904 | AGAGTTGGTAGAGTTCCTTGTG   | ACTACCGGATTAGAGGTTTGTATT |
|                          | 292777 | CCCGTCCAAGTTATGAGCTTAAT  | CAGGAGTACCTGCGCTTATTC    |
| Chr. III<br>(centromere) | 112094 | CCGAAGGCTGGTATGTGATT     | CCAGCTTCCAATTCGTTGTTT    |
|                          | 114443 | GATCAGCGCCAAACAATATGG    | AACTTCCACCAGTAAACGTTTC   |
|                          | 116303 | TGAGTCTTCGTCAGTGCATATT   | CACTTTCATGTTTGGACGTTTCT  |
|                          | 117285 | ACCAAGGAGAGAAGCAAGTTAC   | ATGTCTAGCAACGCCATTCA     |
| Chr. IV<br>(centromere)  | 445519 | GGTTGGGATCTAGGGATTAC     | TGATTGATTACCTAGCCTT      |
|                          | 449630 | ACACGAGCCAGAAATAGTAAC    | TGATTATAAGCATGTGACCTTT   |
|                          | 451309 | GGAATACCGAGACCGTTAG      | ACAGCCCCCATCTTG          |
|                          | 452404 | CTTGGGTCTGTTGGGG         | ATACAAGCCAAGGACCG        |

**Supplementary Table S2. Primers used for site directed mutagenesis**

| Mutation     | Forward primer               | Reverse primer                 |
|--------------|------------------------------|--------------------------------|
| <u>L306E</u> | gaacatactgGAattattgcaaagtg   | tttaattctttgtagtgaaaaatcataggc |
| <u>L307E</u> | gaacatactgtaGAattgcaaagtg    |                                |
| <u>W490A</u> | aacgatcctaGCgcttttcagccattcg | actgtgcactcccatatgggggtg       |
| <u>L491E</u> | aacgatcctatggGAAttcagccattcg |                                |
